# Supplementary material for: Partitioning of carbon export in the upper water column of the oligotrophic South China Sea
Source: Copernicus journal article supplement (doi:10.5194/bg-2022-196), 2022-10-07
Supplement: Supplementary file 1 [file bg-2022-196-supplement.pdf]

Supplement of

**Partitioning of carbon export in the upper water column of  
the oligotrophic South China Sea**

**Yifan Ma et al.**

Correspondence to: Minhan Dai (mdai@xmu.edu.cn)

### **Contents of this file**

**Figure S1.** Relationship between bottle-derived Chl a (Y-axis) and CTD fluorescence-based Chl a (X-axis).

**Figure S2.** Surface distribution of monthly sea level anomalies (SLA, a) and eddy kinetic energy (EKE, b) with water currents during the cruise determined from modeling work. The SLA and EKE indicated stations SEATS, A1 and C1 experienced impacts of the mesoscale eddies.

**Figure S3.** Climatological sea surface temperature anomalies in the SCS during June from the China Sea Multi-scale Ocean Modeling System (CMOMS). Stations C1 and A2, impacted by cold water sourced from the southwest SCS basin during the survey, are shown.

**Figure S4.** Surface distributions of monthly sea level anomalies (SLA) during the summer of 2019 with water currents from modeling work. The SLA show that station SS1 was impacted by mesoscale processes for at least one week before our visit (July 13<sup>th</sup>, 2019).

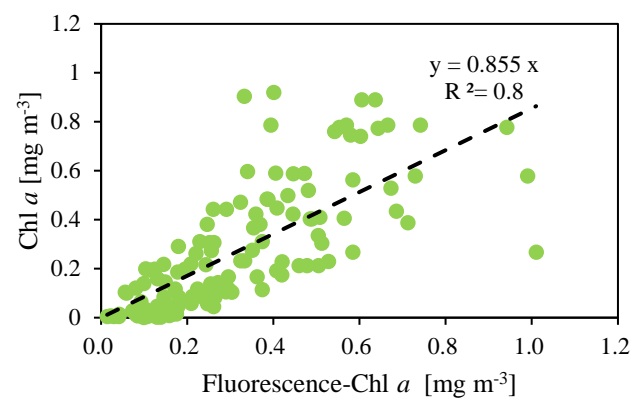

**Figure S1. Relationship between bottle-derived Chl *a* (Y-axis) and CTD fluorescence-based Chl *a* (X-axis).**

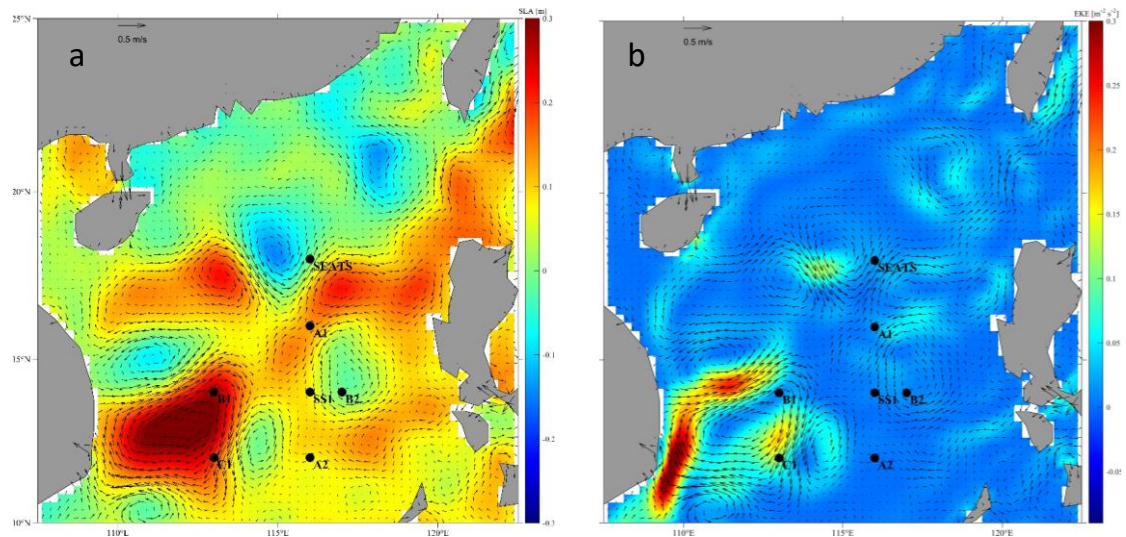

**Figure S2. Surface distribution of monthly sea level anomalies (SLA, a) and eddy kinetic energy (EKE, b) with water currents during the cruise determined from modeling work. The SLA and EKE indicated stations SEATS, A1 and C1 experienced impacts of the mesoscale eddies.**

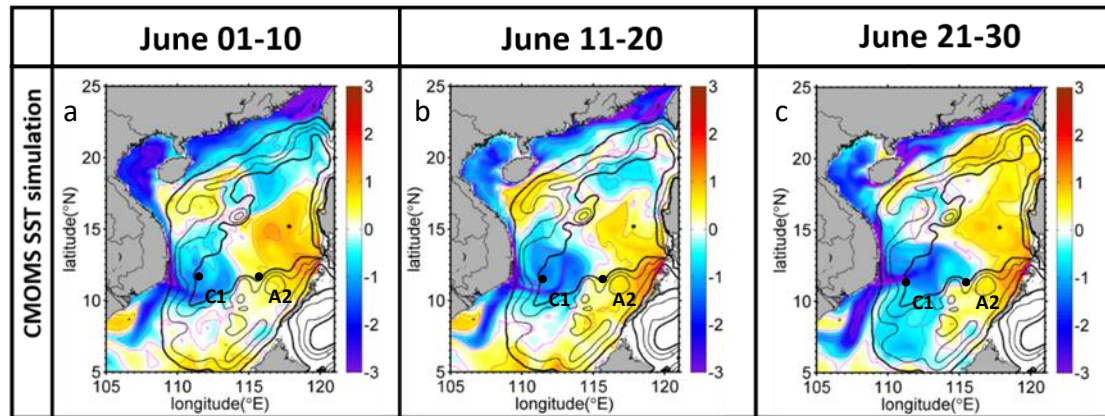

**Figure S3. Climatological sea surface temperature anomalies in the SCS during June from the China Sea Multi-scale Ocean Modeling System (CMOMS). Stations C1 and A2, impacted by cold water sourced from the southwest SCS basin during the survey, are shown.**

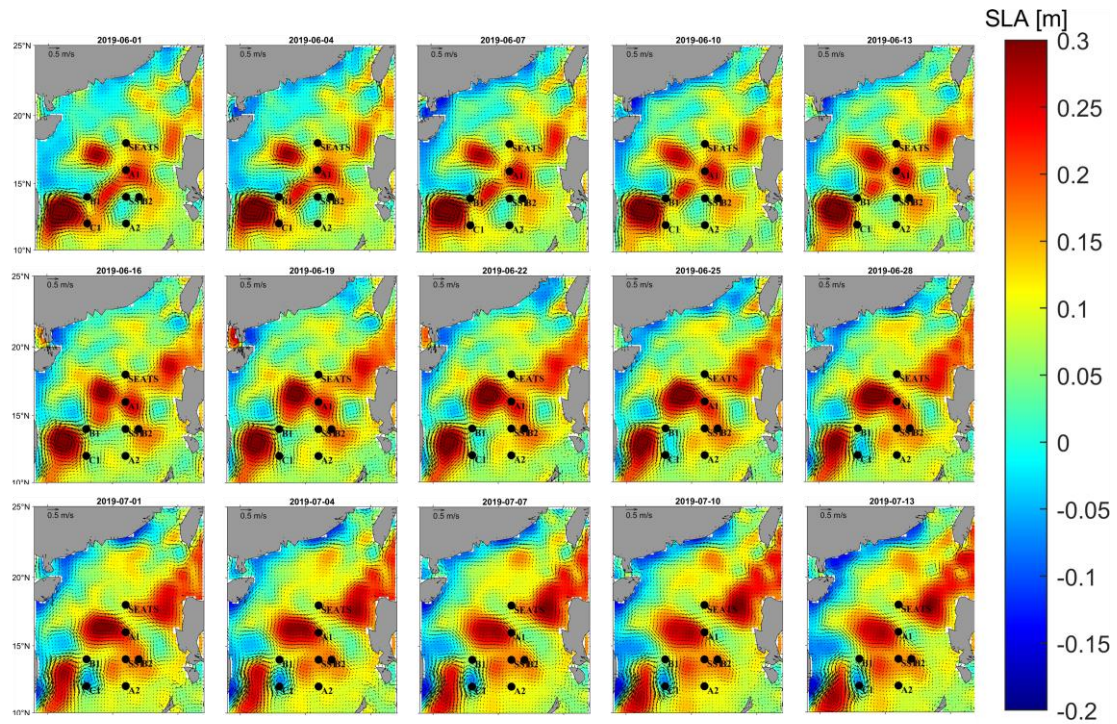

**Figure S4. Surface distributions of monthly sea level anomalies (SLA) during the summer of 2019 with water currents from modeling work. The SLA show that station SS1 was impacted by mesoscale processes for at least one week before our visit (July 13<sup>th</sup>, 2019).**
