# Supplementary material for: Partitioning of carbon export in the upper water column of the oligotrophic South China Sea
Source: Copernicus journal article supplement (doi:10.5194/bg-2022-196), 2022-10-07
Supplement: Supplementary file [file bg-2022-196-AC3-supplement.pdf]

# ***Interactive comment on “Partitioning of carbon export in the upper water column of the oligotrophic South China Sea” by Yifan Ma et al***

Yifan Ma<sup>1</sup>, Kuanbo Zhou<sup>1</sup>, Weifang Chen<sup>1</sup>, Junhui Chen<sup>1</sup>, Jin-Yu Terence Yang<sup>1</sup> & Minhan Dai<sup>1</sup>

5 <sup>1</sup>State Key Laboratory of Marine Environmental Science, College of Ocean and Earth Sciences, Xiamen University, Xiamen, 361102, China

*Correspondence to:* Minhan Dai ([mdai@xmu.edu.cn](mailto:mdai@xmu.edu.cn))

## **Anonymous Referee #1**

Ma et al. calculated POC export fluxes at the base of the NDL and Ez, as well as discussed the NDL's nutrient source. The data is treasurable for understanding nutrient dynamics and the carbon cycle. The outcome is reliable, and the manuscript is well-organized. However, some points must be clarified before accepting for publication. There are also a number of typos. My specific recommendations are listed below.

**[Response]:** We appreciate the positive comments from the reviewer. Our point-by-point responses are listed as of below.

## **Specific recommendations**

15 My biggest concern is about the method calculating the physical transport flux. In eq. 8,  $V$  is part of the tendency term shown in eq. 3. To calculate the horizontal transport flux in the NDL or Ez, it needs to implement an integration over the depth. Whereas, the vertical flux is calculated as the  $wC$ , where  $w$  is the vertical velocity and  $C$  is the concentration of the tracer. It isn't necessary to calculate the “integrated vertical transport flux” over the NDL or Ez as shown in L306. Please recheck your method. I listed some references that introduce the method to calculate transport fluxes. The authors need to introduce how they calculated the horizontal and vertical fluxes clearly.

**[Response]:** The reviewer is correct that integration for calculation of vertical transport flux of  $^{234}\text{Th}$  is unnecessary. We have double checked the calculation of vertical transport flux of  $^{234}\text{Th}$  at the base of the NDL and the Ez. The  $w$  and  $K_z$  at the base of Ez (110 m) were  $-0.10 \text{ m d}^{-1}$  and  $0.86 \text{ m}^2 \text{ d}^{-1}$ , respectively from Gan et al. (2016). The  $^{234}\text{Th}$  activity at 125 m and 100 m was  $2.44 \pm 0.04$  and  $2.50 \pm 0.02 \text{ dpm L}^{-1}$ , respectively at station SS1. The physical term  $V$  of vertical  $^{234}\text{Th}$  flux was estimated to

25 be  $-2.0 \pm 0.4$  dpm  $m^{-2} d^{-1}$  at the base of Ez based on the following equation (adapted from McGillicuddy et al., (2003) as recommended by the reviewer):

$$-V = [w \times (A_{234Th@100m} - A_{234Th@125m})_{Z_{Ec}}] + [K_z \times \frac{(A_{234Th@125m} - 2 \times A_{234Th@Z_{Ec}} + A_{234Th@100})}{\Delta z^2}]$$

where,  $\Delta z$  is the distance between sampling depths. The estimated vertical flux of  $^{234}Th$  at the NDL base was  $-11.4 \pm 0.1$  dpm  $m^{-2} d^{-1}$  at station SS1. Therefore, the physical term could still be neglected. We will revise the text as: “The vertical transport  
30 fluxes were estimated to be  $-2.0 \pm 0.4$  and  $-11.4 \pm 0.1$  dpm  $m^{-2} d^{-1}$  at the base of Ez and NDL, respectively, accounting for <10% of the vertical scavenging fluxes at corresponding layers at the station SS1, which can be considered to be negligible.”

In section 4.3.2, the authors calculated the mass balance of  $^{15}N$  (Eqs. 10, 11). In my understanding, PN which denote particulate nitrogen should be interpreted when it occurred for the first time. It is not clear how to calculate the 3 unknowns (F<sub>pn</sub>, F<sub>no3</sub>,  
35 F<sub>air</sub>) in two equations. Please introduce the calculation carefully.

**[Response]:** Following suggestions, we will explain “PN” at its first appearance, which will read: “POC and particulate nitrogen (PN) concentrations were determined by an Elemental Analyzer-Isotope Ratio Mass Spectrometer (EA-IRMS) system...”.

40 In addition, we have rephrased the parameters and changed Equations 10 & 11 as follows: “

$$I = f_{NO_3^-} + f_{Air} \tag{10}$$

$$\delta^{15}N_{PN} = \delta^{15}N_{NO_3^-} \times f_{NO_3^-} + \delta^{15}N_{air} \times f_{air} \tag{11}$$

where,  $f_{NO_3^-}$  and  $f_{Air}$  represent the fraction of PN export contributed by upwelled DIN from the subsurface and by atmospheric deposition and  $N_2$  fixation, respectively.  $\delta^{15}N_{NO_3^-}$  and  $\delta^{15}N_{air}$  denote the endmembers of  $\delta^{15}N$  for DIN in subsurface waters  
45 and air-derived N, respectively.”

The authors discovered that horizontal transport flux accounts for 20% of total flux. However, the fraction is not negligible. Some stations were shown to be influenced by eddy activities. It is worthwhile to consider the horizontal transport of eddies whose effect is not only vertical. There are some studies discussed the horizontal transport of particles in eddies e.g. Wang et al., 2018 <http://dx.doi.org/10.1029/2017JC013623>, Ma et al., 2021, <http://dx.doi.org/10.1016/j.pocean.2021.102566>. Can you  
50

separate the nutrients trapped in the cyclonic eddy and transported with the eddy (horizontal transport) and local uplifted nutrients (vertical transport)? Stations B1 and C2 may be affected by the upwelling off the coast of Vietnam.

55 **[Response]:** We appreciate these important comments from the reviewer aiming for improving the flux estimate. Meanwhile, we have to recognize that the horizontal transport flux of 20% was an upper limit of estimates, which is overall comparable with the magnitude of the uncertainty from <sup>234</sup>Th measurements (could be >10%). Therefore, the horizontal flux of <20% of the total flux have been typically omitted in many prior studies given the difficulty in the estimation therein (e.g., Buesseler et al., 2020; Wei et al., 2011). We will add such reasoning in our revision.

60 We agree with the reviewer that mesoscale eddies impact flux estimations. Unfortunately, such effects of eddies cannot be resolved from the present study. We will add in our revision such potential impacts of mesoscale eddies. The reviewer also made significant comments on different pathways of nutrient trapping. But again, distinguishing these processes is extremely challenging (Guo et al., 2017; Zhao et al., 2021). Nevertheless, we considered the comments from the reviewer and will add the following text: “It is also worthwhile to consider that influences from mesoscale and sub-mesoscale processes in eddies in the SCS basin. Prior studies showed that the concurrence of the vertical transport of particles supported by local uplifted  
65 nutrients and the horizontal transport of particles supported by the nutrients trapped in eddies (Wang et al., 2018, Ma et al., 2021). In this study, we found enhanced POC export fluxes at stations with high nutrient inventories, which might infer that the POC export flux might also be supported by nutrients from the subsurface based on the signal of  $\delta^{15}N_{PN}$ . However, our current study was unable to diagnose the pathways of nutrients fuelling the primary and export production.”.

**Minor concerns:**

70 L36: Siegel et al., 2021

[Response]: Corrected

L41-42: Need references

[Response]: Accepted. We will add the relevant references in the revision. “(Benitez-Nelson et al., 2001; Cai et al., 2015;

75 Zhou et al., 2020).”

L53: the references are not recent ones. Don't use the word recently.

[Response]: Accepted and revision will be made accordingly.

80 Figure 1: Denote the shading and add a color bar.

[Response]: Accepted. We redraw the map and add a color bar in the revised version.

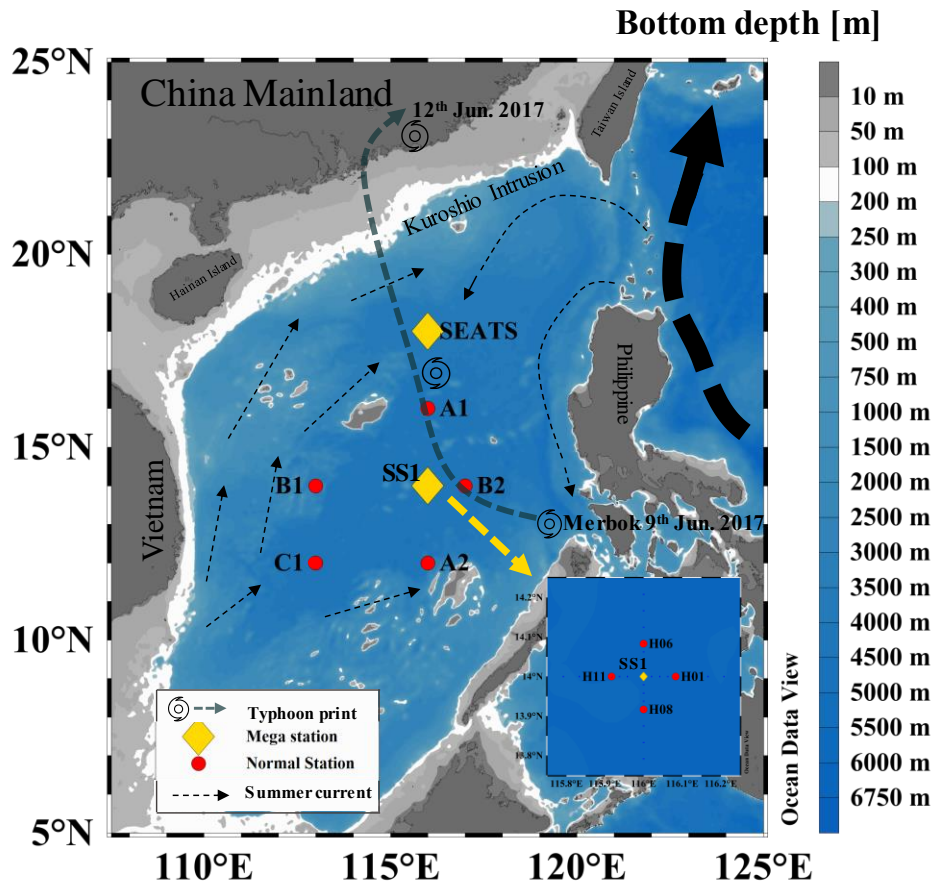

Please consider to make a new table to show the location, water depth, sampling depth, sampling time etc.

85 **[Response]:** As suggested by the reviewer, three tables: the location of sampling stations with arriving and leaving time, water bottom depth, parameters and data utilization in the Table R1 and sampling depth with the <sup>234</sup>Th and POC data in Table R2 are available in the revised manuscript.

Table R1: Sampling logs and site information along with the accessed parameters and their utilizations.

| Station | Arriving time    | Latitude<br>[°N] | Longitude<br>[°E] | Bottom depth<br>[m] | Parameters              |      | Data utilizations                 |                              |
|---------|------------------|------------------|-------------------|---------------------|-------------------------|------|-----------------------------------|------------------------------|
|         |                  |                  |                   |                     | Total <sup>234</sup> Th | Trap | Partitioning POC<br>flux estimate | Nutrient source<br>diagnosis |
| SEATS   | 2017-06-07 00:06 | 18               | 116               | 3907                | ✓                       | ✓    | ✓                                 | ✓                            |
| A1*     | 2017-06-11 23:55 | 16               | 116               | 4205                | ✓                       |      | ✓                                 |                              |
| SS1     | 2017-06-12 20:08 | 14               | 116               | 4107                | ✓                       |      | ✓                                 |                              |
| H06     | 2017-06-20 02:28 | 14.1             | 116               | 4289                | ✓                       |      | ✓                                 |                              |
| H08     | 2017-06-20 07:51 | 13.9             | 116               | 4063                | ✓                       |      | ✓                                 |                              |
| H01     | 2017-06-20 23:41 | 14               | 116.1             | 4139                | ✓                       |      | ✓                                 |                              |
| H11     | 2017-06-21 05:18 | 14               | 115.9             | 4297                | ✓                       |      | ✓                                 |                              |
| B1      | 2017-06-22 11:43 | 14               | 113               | 2537                | ✓                       |      | ✓                                 |                              |
| C1      | 2017-06-23 04:40 | 12               | 113               | 4313                | ✓                       |      | ✓                                 |                              |
| A2      | 2017-06-24 03:05 | 12               | 116               | 4079                | ✓                       |      | ✓                                 |                              |
| B2      | 2017-06-24 21:42 | 14               | 117               | 3947                | ✓                       |      | ✓                                 |                              |

90 \*Sampling station might be influenced by the typhoon event passing through the South China Sea. Station A1 was visited after typhoon Merbok, which was generated on June 9, 2017 at 13.1°N, 119.8°E in the southern China Sea. Merbok landed on June 12 at 27.5°N, 117.3°E.

Table R2: The list of total and particulate  $^{234}\text{Th}$  activity and POC concentration at sampling depth at stations

| Station | Latitude   | Longitude  | Depth | Tot. $^{234}\text{Th}$ | Tot. $^{234}\text{Th}$ error | POC                  | Part. $^{234}\text{Th}$ | Part. $^{234}\text{Th}$ error |
|---------|------------|------------|-------|------------------------|------------------------------|----------------------|-------------------------|-------------------------------|
|         | degree (N) | degree (E) | m     | dpm L <sup>-1</sup>    | dpm L <sup>-1</sup>          | μmol L <sup>-1</sup> | dpm L <sup>-1</sup>     | dpm L <sup>-1</sup>           |
| SEATS   | 18         | 116        | 130   | 2.55                   | 0.06                         | 0.6                  | 0.13                    | 0.01                          |
| SEATS   | 18         | 116        | 100   | 2.47                   | 0.06                         | 0.8                  | 0.20                    | 0.01                          |
| SEATS   | 18         | 116        | 95    | 2.73                   | 0.07                         | 2.0                  | 0.32                    | 0.01                          |
| SEATS   | 18         | 116        | 85    | 2.41                   | 0.05                         | 2.1                  | 0.39                    | 0.01                          |
| SEATS   | 18         | 116        | 75    | 2.29                   | 0.06                         | 2.4                  | 0.47                    | 0.01                          |
| SEATS   | 18         | 116        | 65    | 2.30                   | 0.06                         | 2.2                  | 0.43                    | 0.01                          |
| SEATS   | 18         | 116        | 55    | 2.03                   | 0.05                         | 1.8                  | 0.41                    | 0.01                          |
| SEATS   | 18         | 116        | 45    | 2.22                   | 0.06                         | 1.3                  | 0.30                    | 0.01                          |
| SEATS   | 18         | 116        | 35    | 2.13                   | 0.05                         | 1.4                  | 0.16                    | 0.01                          |
| SEATS   | 18         | 116        | 25    | 2.30                   | 0.05                         | 1.6                  | 0.12                    | 0.01                          |
| SEATS   | 18         | 116        | 15    | 2.03                   | 0.05                         | 1.2                  | 0.15                    | 0.01                          |
| SEATS   | 18         | 116        | 5     | 2.27                   | 0.05                         | 1.1                  | 0.11                    | 0.01                          |
| A1      | 16         | 116        | 100   | 2.59                   | 0.05                         | 1.1                  | 0.26                    | 0.01                          |
| A1      | 16         | 116        | 75    | 2.47                   | 0.05                         | 2.5                  | 0.26                    | 0.01                          |
| A1      | 16         | 116        | 50    | 2.17                   | 0.05                         | 1.8                  | 0.29                    | 0.01                          |
| A1      | 16         | 116        | 25    | 1.70                   | 0.25                         | 1.3                  | 0.15                    | 0.01                          |
| A1      | 16         | 116        | 5     | 2.34                   | 0.06                         | 1.3                  | 0.11                    | 0.01                          |
| SS1     | 14         | 116        | 125   | 2.44                   | 0.05                         | 0.8                  | 0.25                    | 0.01                          |
| SS1     | 14         | 116        | 110   | 2.42                   | 0.10                         | 0.9                  | 0.27                    | 0.01                          |
| SS1     | 14         | 116        | 100   | 2.39                   | 0.06                         | 1.3                  | 0.42                    | 0.01                          |
| SS1     | 14         | 116        | 95    | 2.50                   | 0.06                         | 1.3                  | 0.41                    | 0.01                          |
| SS1     | 14         | 116        | 85    | 2.32                   | 0.06                         | 1.7                  | 0.41                    | 0.01                          |
| SS1     | 14         | 116        | 75    | 1.98                   | 0.06                         | 1.3                  | 0.30                    | 0.01                          |
| SS1     | 14         | 116        | 65    | 2.06                   | 0.05                         | 1.5                  | 0.35                    | 0.01                          |
| SS1     | 14         | 116        | 55    | 2.35                   | 0.05                         | 1.4                  | 0.23                    | 0.01                          |
| SS1     | 14         | 116        | 45    | 2.15                   | 0.06                         | 0.6                  | 0.20                    | 0.01                          |
| SS1     | 14         | 116        | 35    | 2.04                   | 0.05                         | 1.3                  | 0.14                    | 0.01                          |
| SS1     | 14         | 116        | 25    | 2.15                   | 0.05                         | 1.1                  | 0.18                    | 0.01                          |
| SS1     | 14         | 116        | 15    | 1.99                   | 0.05                         | 1.2                  | 0.17                    | 0.01                          |
| SS1     | 14         | 116        | 5     | 2.15                   | 0.07                         | 1.2                  | 0.19                    | 0.01                          |
| H06     | 14.1       | 116        | 100   | 2.41                   | 0.05                         | 1.4                  | 0.50                    | 0.01                          |
| H06     | 14.1       | 116        | 75    | 2.05                   | 0.05                         | 1.5                  | 0.42                    | 0.01                          |
| H06     | 14.1       | 116        | 50    | 2.33                   | 0.05                         | 1.1                  | 0.19                    | 0.01                          |
| H06     | 14.1       | 116        | 25    | 2.21                   | 0.05                         | 1.0                  | 0.13                    | 0.01                          |
| H06     | 14.1       | 116        | 5     | 2.27                   | 0.05                         | 1.0                  | 0.11                    | 0.01                          |

| Station | Latitude   | Longitude  | Depth | Tot. <sup>234</sup> Th | Tot. <sup>234</sup> Th error | POC                  | Part. <sup>234</sup> Th | Part. <sup>234</sup> Th error |
|---------|------------|------------|-------|------------------------|------------------------------|----------------------|-------------------------|-------------------------------|
|         | degree (N) | degree (E) | m     | dpm L <sup>-1</sup>    | dpm L <sup>-1</sup>          | μmol L <sup>-1</sup> | dpm L <sup>-1</sup>     | dpm L <sup>-1</sup>           |
| H08     | 13.9       | 116        | 100   | 2.39                   | 0.05                         | 1.4                  | 0.30                    | 0.01                          |
| H08     | 13.9       | 116        | 75    | 2.15                   | 0.05                         | 1.9                  | 0.30                    | 0.01                          |
| H08     | 13.9       | 116        | 50    | 2.25                   | 0.05                         | 1.4                  | 0.23                    | 0.01                          |
| H08     | 13.9       | 116        | 25    | 2.21                   | 0.05                         | 1.1                  | 0.25                    | 0.01                          |
| H08     | 13.9       | 116        | 5     | 2.27                   | 0.05                         | 0.9                  | 0.16                    | 0.01                          |
| H01     | 14         | 116.1      | 100   | 2.45                   | 0.05                         | 1.8                  | 0.53                    | 0.01                          |
| H01     | 14         | 116.1      | 75    | 2.25                   | 0.05                         | 1.3                  | 0.22                    | 0.01                          |
| H01     | 14         | 116.1      | 50    | 2.29                   | 0.05                         | 1.8                  | 0.34                    | 0.01                          |
| H01     | 14         | 116.1      | 25    | 2.25                   | 0.05                         | 1.6                  | 0.24                    | 0.01                          |
| H01     | 14         | 116.1      | 5     | 2.10                   | 0.05                         | 1.3                  | 0.15                    | 0.01                          |
| H11     | 14         | 116.1      | 100   | 2.46                   | 0.05                         | 1.3                  | 0.30                    | 0.01                          |
| H11     | 14         | 116.1      | 75    | 2.23                   | 0.04                         | 1.1                  | 0.40                    | 0.01                          |
| H11     | 14         | 116.1      | 50    | 2.25                   | 0.05                         | 1.3                  | 0.13                    | 0.01                          |
| H11     | 14         | 116.1      | 25    | 2.29                   | 0.05                         | 1.0                  | 0.08                    | 0.01                          |
| H11     | 14         | 116.1      | 5     | 2.09                   | 0.04                         | 1.0                  | 0.11                    | 0.01                          |
| B1      | 14         | 113        | 100   | 2.44                   | 0.05                         | 1.4                  | 0.23                    | 0.01                          |
| B1      | 14         | 113        | 88    | 2.08                   | 0.04                         | 2.0                  | 0.52                    | 0.01                          |
| B1      | 14         | 113        | 75    | 2.30                   | 0.08                         | 1.8                  | 0.41                    | 0.01                          |
| B1      | 14         | 113        | 50    | 2.21                   | 0.05                         | 1.4                  | 0.40                    | 0.01                          |
| B1      | 14         | 113        | 25    | 2.24                   | 0.04                         | 1.2                  | 0.08                    | 0.01                          |
| B1      | 14         | 113        | 5     | 2.24                   | 0.05                         | 0.9                  | 0.06                    | 0.01                          |
| C1      | 12         | 113        | 100   | 2.55                   | 0.05                         | 0.7                  | 0.21                    | 0.01                          |
| C1      | 12         | 113        | 88    | 2.49                   | 0.05                         | 0.8                  | 0.25                    | 0.01                          |
| C1      | 12         | 113        | 75    | 2.38                   | 0.04                         | 1.9                  | 0.30                    | 0.01                          |
| C1      | 12         | 113        | 50    | 2.05                   | 0.04                         | 1.5                  | 0.23                    | 0.01                          |
| C1      | 12         | 113        | 25    | 2.10                   | 0.09                         | 1.6                  | 0.25                    | 0.01                          |
| C1      | 12         | 113        | 5     | 2.06                   | 0.04                         | 2.1                  | 0.29                    | 0.01                          |
| A2      | 12         | 116        | 100   | 2.63                   | 0.05                         | 1.1                  | 0.21                    | 0.01                          |
| A2      | 12         | 116        | 88    | 2.21                   | 0.04                         | 0.9                  | 0.42                    | 0.01                          |
| A2      | 12         | 116        | 75    | 2.16                   | 0.04                         | 1.5                  | 0.25                    | 0.01                          |
| A2      | 12         | 116        | 50    | 2.01                   | 0.04                         | 1.5                  | 0.23                    | 0.01                          |
| A2      | 12         | 116        | 25    | 2.18                   | 0.04                         | 1.2                  | 0.09                    | 0.01                          |
| A2      | 12         | 116        | 5     | 1.85                   | 0.06                         | 1.2                  | 0.14                    | 0.01                          |
| B2      | 14         | 117        | 108   | 2.51                   | 0.04                         | 1.1                  | 0.13                    | 0.01                          |
| B2      | 14         | 117        | 100   | 2.49                   | 0.04                         | 0.9                  | 0.27                    | 0.01                          |
| B2      | 14         | 117        | 75    | 2.24                   | 0.04                         | 1.3                  | 0.15                    | 0.01                          |

| Station | Latitude   | Longitude  | Depth | Tot. $^{234}\text{Th}$ | Tot. $^{234}\text{Th}$ error | POC                    | Part. $^{234}\text{Th}$ | Part. $^{234}\text{Th}$ error |
|---------|------------|------------|-------|------------------------|------------------------------|------------------------|-------------------------|-------------------------------|
|         | degree (N) | degree (E) | m     | dpm L <sup>-1</sup>    | dpm L <sup>-1</sup>          | $\mu\text{mol L}^{-1}$ | dpm L <sup>-1</sup>     | dpm L <sup>-1</sup>           |
| B2      | 14         | 117        | 50    | 2.22                   | 0.05                         | 1.8                    | 0.27                    | 0.01                          |
| B2      | 14         | 117        | 25    | 2.40                   | 0.05                         | 1.1                    | 0.12                    | 0.01                          |
| B2      | 14         | 117        | 5     | 2.25                   | 0.05                         | 1.3                    | 0.28                    | 0.01                          |



Eq. 3 is the same as Eq. 1.

100 **[Response]:** Fixed. We will revise the equation as:

$$F_{Th}^{Ez} = \int_0^{Ez} (A_U - A_{Th}) \times \lambda dz \quad (3)$$

The font is too small in Figure 4.

**[Response]:** We appreciate the reviewer's comment. We have enlarged the font sizes as of below.

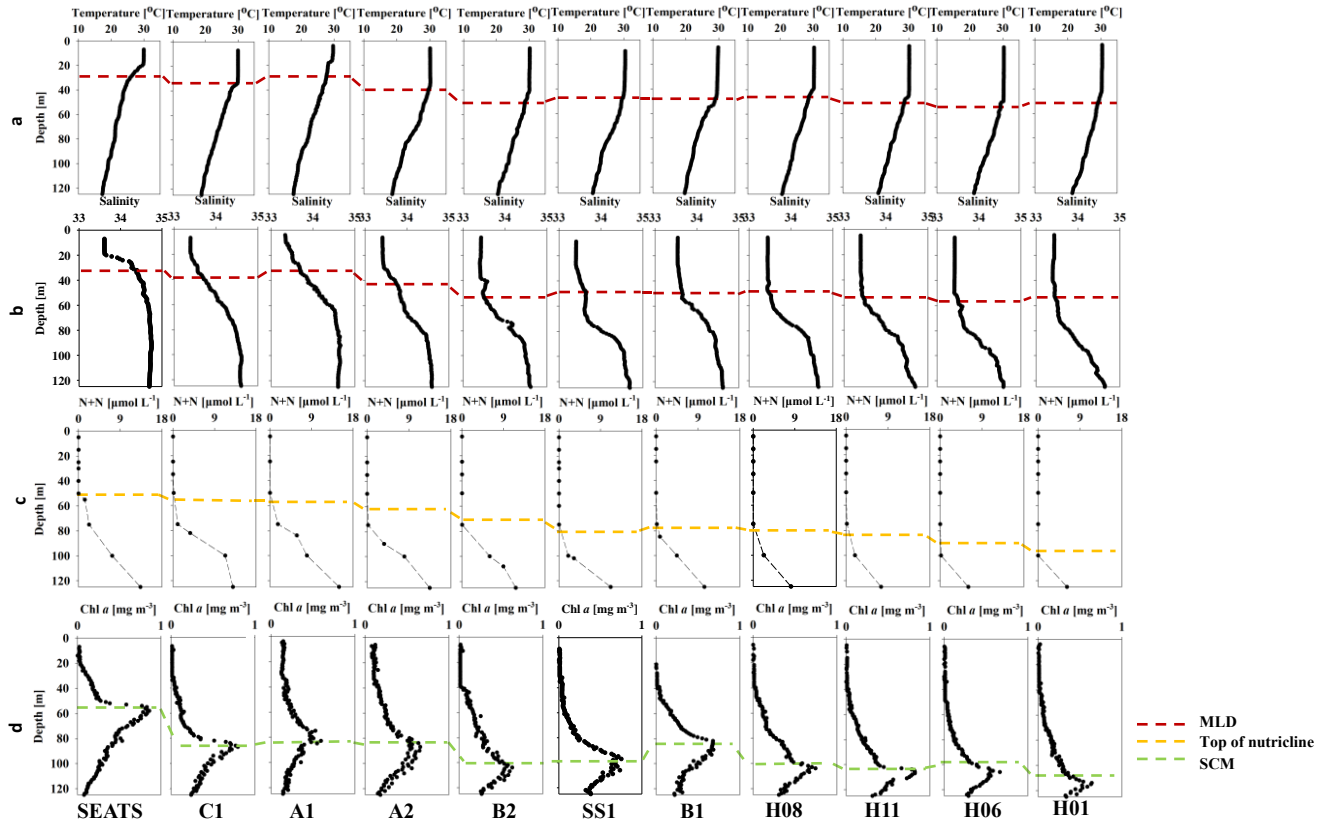

105

Eq9. What's the delta x and delta y.

**[Response]:** We appreciate the reviewer's comment. Eq. 9 aimed to resolve the horizontally diffusive flux of  $^{234}\text{Th}$ . The  $\Delta x$  and  $\Delta y$  are the distance between the normal stations to evaluate the influences of physical terms ( $\Delta y$  was the distance between station H06 and H08 and equal to 18 km) in this study.

110 We will explain the  $\Delta x$  and  $\Delta y$  in our revision: "The  $\Delta x$  and  $\Delta y$  are the distance between the normal stations to evaluate the influences of physical terms (i.e.,  $\Delta x$  is the distances between stations H01 and H11;  $\Delta y$  is the distances between stations H06 and H08).  $\Delta x$  and  $\Delta y$  were equal to 18 km in this study."

## References

- 115 Benitez-Nelson, C., K. O. Buesseler, D. M. Karl, and J. Andrews: A time-series study of particulate matter export in the North Pacific Subtropical Gyre based on  $^{234}\text{Th}$ :  $^{238}\text{U}$  disequilibrium, *Deep-Sea Res I*, 48, 2595-2611, 10.1016/S0967-0637(01)00032-2, 2001.
- 120 Buesseler, K. O., C. R. Benitez-Nelson, M. Roca-Martí, A. M. Wyatt, L. Resplandy, S. J. Clevenger, J. A. Drysdale, M. L. Estapa, S. Pike, and B. P. Umhau: High-resolution spatial and temporal measurements of particulate organic carbon flux using thorium-234 in the northeast Pacific Ocean during the EXport Processes in the Ocean from RemoTe Sensing field campaign, *Elementa-Sci Anthrop*, 8, 1, 10.1525/elementa.2020.030, 2020.
- Cai, P. H., D. C. Zhao, L. Wang, B. Q. Huang, and M. H. Dai: Role of particle stock and phytoplankton community structure in regulating particulate organic carbon export in a large marginal sea, *J Geophys Res-Oceans*, 120, 2063-2095, 10.1002/2014jc010432, 2015.
- 125 Gan, J. P., Z. Q. Liu, and L. L. Liang: Numerical modeling of intrinsically and extrinsically forced seasonal circulation in the China Seas: A kinematic study, *J Geophys Res-Oceans*, 121, 4697-4715, 10.1002/2016jc011800, 2016.
- Guo, M. X., P. Xiu, S. Y. Li, F. Chai, H. J. Xue, K. B. Zhou, and M. H. Dai: Seasonal variability and mechanisms regulating chlorophyll distribution in mesoscale eddies in the South China Sea, *J Geophys Res-Oceans*, 122, 5329-5347, 10.1002/2016jc012670, 2017.
- 130 Ma, W. T., P. Xiu, F. Chai, L. H. Ran, M. G. Wiesner, J. Y. Xi, Y. W. Yan, and E. Fredj: Impact of mesoscale eddies on the source funnel of sediment trap measurements in the South China Sea, *Prog Oceanogr*, 194, 10.1016/j.pocean.2021.102566, 2021.
- McGillicuddy, D. J., L. A. Anderson, S. C. Doney, and M. E. Maltrud: Eddy-driven sources and sinks of nutrients in the upper ocean: Results from a 0.1 degrees resolution model of the North Atlantic, *Global Biogeochem Cy*, 17, 10.1029/2002gb001987, 2003.
- 135 Wang, L., B. Q. Huang, E. A. Laws, K. B. Zhou, X. Liu, Y. Y. Xie, and M. H. Dai: Anticyclonic Eddy Edge Effects on Phytoplankton Communities and Particle Export in the Northern South China Sea, *J Geophys Res-Oceans*, 123, 7632-7650, 10.1029/2017jc013623, 2018.

- 140 Wei, C. L., S. Y. Lin, D. D. Sheu, W. C. Chou, M. C. Yi, P. H. Santschi, and L. S. Wen: Particle-reactive radionuclides ( $^{234}\text{Th}$ ,  $^{210}\text{Pb}$ ,  $^{210}\text{Po}$ ) as tracers for the estimation of export production in the South China Sea, *Biogeosciences*, 8, 3793-3808, 10.5194/bg-8-3793-2011, 2011.
- Zhao, D. D., Y. S. Xu, X. G. Zhang, and C. Huang: Global chlorophyll distribution induced by mesoscale eddies, *Remote Sens Environ*, 254, 10.1016/j.rse.2020.112245, 2021.
- 145 Zhou, K. B., M. H. Dai, K. Maiti, W. F. Chen, J. H. Chen, Q. Q. Hong, Y. F. Ma, P. Xiu, L. Wang, and Y. Y. Xie: Impact of physical and biogeochemical forcing on particle export in the South China Sea, *Prog Oceanogr*, 187, 102403, 10.1016/j.pocean.2020.102403, 2020.
